# Supplementary material for: Neferine induces autophagy of human ovarian cancer cells via p38 MAPK/ JNK activation
Source: Springer Nature journal article supplement (doi:10.1007/s13277-015-4737-8), 2016-01-07
Supplement: MOESM3 [file 9261704]

**Table 1** IC50 values (Neferine **/**μM)

| Cell line | 48h | 72h |
| --- | --- | --- |
| FTE187 | 12.10μM | 11.45μM |
| A2780 | 11.57μM | 9.24μM |
| HO8910 | 9.43μM | 8.02μM |
